# Supplementary material
Source: Springer Nature journal article supplement (https://www.springermedizin.de/resource/supplementary/12890_2008_135_MOESM1_ESM.pdf/9506080)
Supplement: MOESM1 [file 9506080]

Perinatal  
period

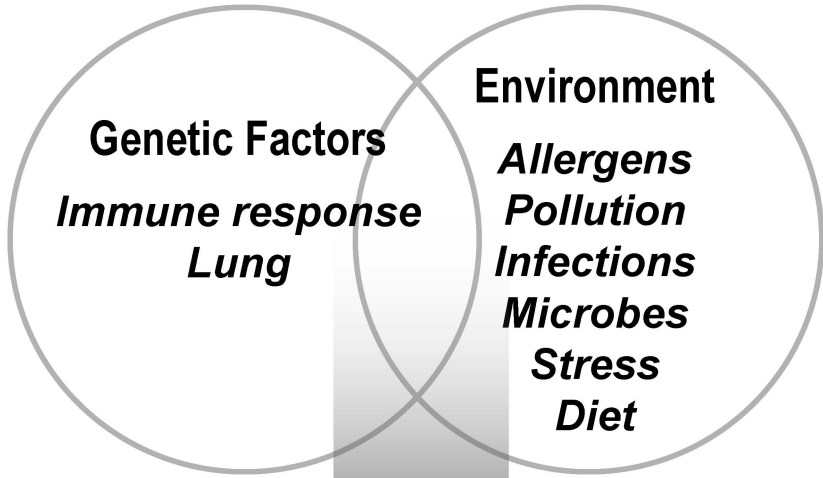

Infancy

**Altered Innate and  
Adaptive Immune Responses**

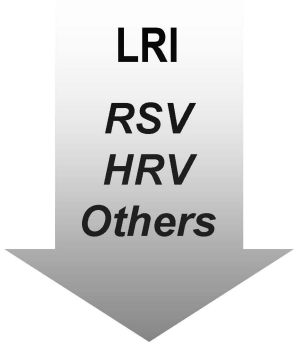

Early  
childhood

**Persistent wheezing & asthma**
